# Supplementary material for: A Novel One-Step Fabricated, Droplet-Based Electrochemical Sensor for Facile Biochemical Assays
Source: MDPI journal article supplement (doi:10.3390/s16081231), 2016-08-04
Supplement: s1 [file s1]

# Supplementary Materials: A Novel One-Step Fabricated, Droplet-Based Electrochemical Sensor for Facile Biochemical Assays

Yong Yao and Chunsun Zhang

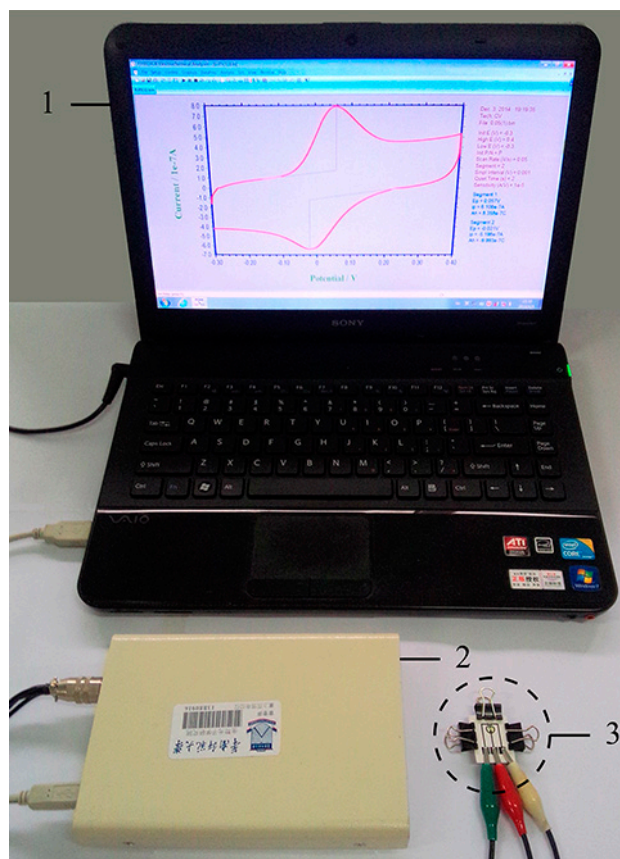

**Figure S1.** Photograph of the setup. The device principally consists of a personal computer (1), handheld bipotentiostat (2), and droplet-based electrochemical (EC) sensor (3).

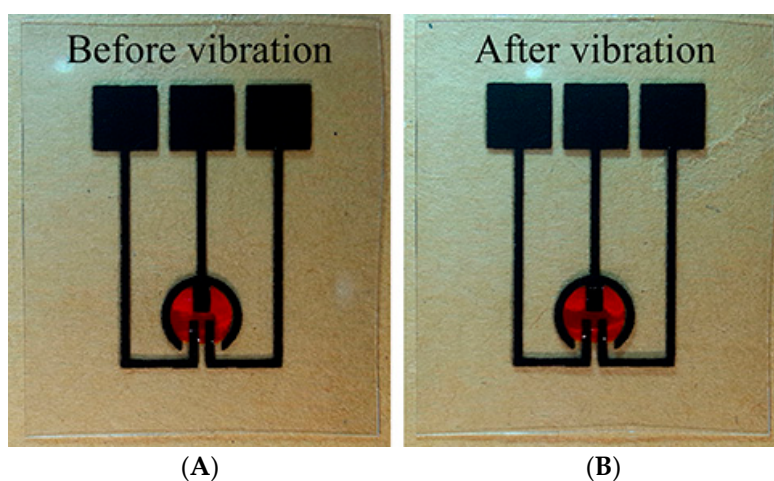

**Figure S2.** Photograph of the droplet-based electrochemical (EC) sensor before (A) and after (B) vibration. Here, the vibration parameters included as follows: rotational speed (180 rpm), displacement (~2 cm) and duration of perturbation (12 s).

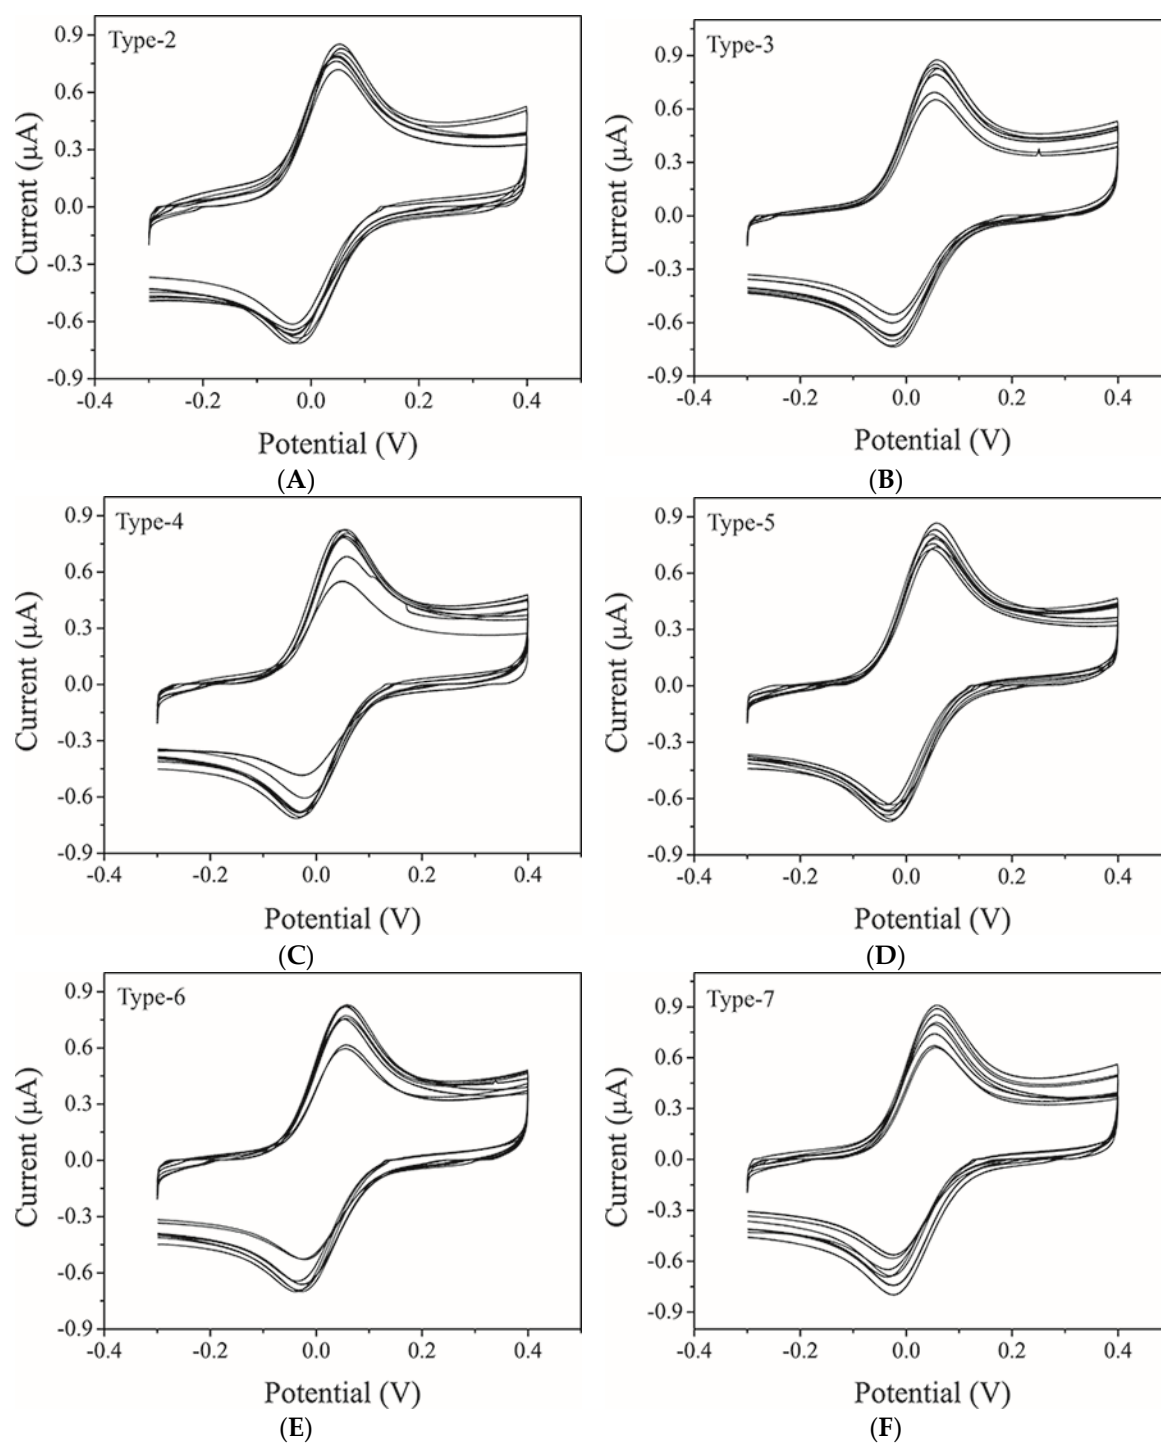

**Figure S3.** Cyclic voltammograms of 2.0 mM ferrocene carboxylic acid (FCA) in 0.5 M KCl aqueous solution using Type-2 (A); Type-3 (B); Type-4 (C); Type-5 (D); Type-6 (E) and Type-7 (F) electrochemical (EC) sensors (scan rate: 100 mV/s; potential range: -0.3 to 0.4 V versus carbon pseudo-reference electrode). Here, eight independent measurements were performed for each pattern.
